# Supplementary material for: Evaluating The Infinium Human MethylationEPIC v2 BeadChip
Source: Research Square preprint supplement (doi:10.21203/rs.3.rs-2781268/v1), 2023-04-21
Supplement: Supplementary file 1 [file 4f8e6e4fbfb3d05ac3b0ce0b.xlsx]

## Sheet: Epigenetic clocks
Clock	Target	Study	PMID
PhenoAge	Aging / Healthspan (Blood / pan tissue)	An epigenetic biomarker of aging for lifespan and healthspan	296769998
Horvath1	Aging (All tissues)	DNA methylation age of human tissues and cell types	24138928
Horvath2	Aging (Skin / Blood)	Epigenetic clock for skin and blood cells applied to Hutchinson Gilford Progeria Syndrome and ex vivo studies	30048243
EpiTOC	Mitotic rate	Correlation of an epigenetic mitotic clock with cancer risk	27716309
PCClock	Aging (Blood)	A computational solution for bolstering reliability of epigenetic clocks: implications for clinical trials and longitudinal tracking	36277076
MarioniPredictors	Circulating proteome	Epigenetic scores for the circulating proteome as tools for disease prediction	35023833
Hannum	Aging (Blood)	Genome-wide methylation profiles reveal quantitative views of human aging rates	23177740
DunedinPACE	Pace of aging (Blood)	a DNA methylation biomarker of the pace of aging	35029144
Telomere	Telomere length (Blood)	DNA methylation-based estimator of telomere length	31422385

## Sheet: Cell deconvolution panels
Panel	Target	Study	PMID
CellTypeDMLImmune	Differential methlyation whole blood	Differential DNA methylation in purified human blood cells: implications for cell lineage and studies on disease susceptibility	22848472
Epidish12Cell	Differential methylation peripheral blood reference	Enhanced cell deconvolution of peripheral blood using DNA methylation for high-resolution immune profiling	35140201
EpidishDHSBloodDMC_7cell	Differential methlyation blood reference	A comparison of reference-based algorithms for correcting cell-type heterogeneity in Epigenome-Wide Association Studies	28193155
IDOL_Salas2018	Differential methlyation blood reference	An optimized library for reference-based deconvolution of whole-blood biospecimens assayed using the Illumina HumanMethylationEPIC BeadArray	29843789
SalivaReference	Differential methylation saliva reference	Construction and validation of a DNA methylation reference matrix for saliva	NA
CellTypeDMLBrain	Differential methylation neuron vs. glia reference	A cell epigenotype specific model for the correction of brain cellular heterogeneity bias and its application to age, brain region and major depression	23426267
CellTypeDMLSaliva	Differentail methylation saliva reference	Saliva cell type DNA methylation reference panel for epidemiological studies in children	33588693
